# Supplementary material
Source: PubMed Central journal article supplement (PMC1852405)
Supplement: gb-2007-8-2-402-S3.pdf [file gb-2007-8-2-402-S3.pdf]

**Additional Data File 3. 32 groups of genomes with ANI >= 94% within each group.**

Bacillus anthracis str. Ames  
Bacillus anthracis str. Sterne  
Bacillus cereus ATCC10987  
Bacillus cereus ZK  
Bacillus thuringiensis konkukian  
Bacillus anthracis Ames 0581

Bacillus licheniformis DSM 13  
Bacillus licheniformis ATCC 14580

Bordetella bronchiseptica RB50  
Bordetella pertussis Tohama I  
Bordetella parapertussis 12822

Brucella abortus 9-941  
Brucella melitensis 16M  
Brucella melitensis biovar Abortus 2308  
Brucella suis 1330

Burkholderia mallei ATCC 23344  
Burkholderia pseudomallei 1710b  
Burkholderia pseudomallei K96243

Campylobacter jejuni RM1221  
Campylobacter jejuni subsp. jejuni NCTC 11168

Chlamydia trachomatis A HAR-13  
Chlamydia trachomatis D/UW-3/CX

Chlamydomydia pneumoniae AR39  
Chlamydomydia pneumoniae CWL029  
Chlamydomydia pneumoniae J138  
Chlamydomydia pneumoniae TW 183

Corynebacterium glutamicum ATCC 13032 Kitasato  
Corynebacterium glutamicum ATCC 13032 Bielefeld

Ehrlichia ruminantium Gardel  
Ehrlichia ruminantium str Welgevonden (South Africa)  
Ehrlichia ruminantium str. Welgevonden (France)

Escherichia coli CFT073  
Escherichia coli K12  
Escherichia coli O157H7  
Escherichia coli O157H7 EDL933  
Escherichia coli UTI89  
Escherichia coli W3110  
Shigella boydii Sb227  
Shigella dysenteriae Sd197  
Shigella flexneri 2a  
Shigella flexneri 2a 2457T  
Shigella sonnei Ss046

Francisella tularensis tularensis  
Francisella tularensis holarctica SCHU S4

Haemophilus influenzae 86 028NP  
Haemophilus influenzae Rd KW20

Legionella pneumophila Paris  
Legionella pneumophila Lens  
Legionella pneumophila Philadelphia 1

Leptospira interrogans serovar Lai  
Leptospira interrogans serovar Copenhageni

Mycobacterium bovis AF2122/97  
Mycobacterium tuberculosis CDC1551  
Mycobacterium tuberculosis H37Rv

Mycoplasma hyopneumoniae 232  
Mycoplasma hyopneumoniae 7448  
Mycoplasma hyopneumoniae J

Neisseria meningitidis MC58  
Neisseria gonorrhoeae FA 1090  
Neisseria meningitidis Z2491

Rickettsia typhi Wilmington  
Rickettsia prowazekii Madrid E

Salmonella enterica Choleraesuis  
Salmonella enterica Paratyphi ATCC 9150  
Salmonella typhi CT18  
Salmonella typhi Ty2  
Salmonella typhimurium LT2

Staphylococcus aureus aureus MRSA252  
Staphylococcus aureus Mu50  
Staphylococcus aureus N315  
Staphylococcus aureus NCTC 8325  
Staphylococcus aureus aureus MSSA476  
Staphylococcus aureus COL  
Staphylococcus aureus MW2  
Staphylococcus aureus USA300  
Staphylococcus aureus RF122

Staphylococcus epidermidis ATCC 12228  
Staphylococcus epidermidis RP62A

Streptococcus agalactiae 2603  
Streptococcus agalactiae NEM316  
Streptococcus agalactiae A909

Streptococcus pyogenes M1 GAS  
Streptococcus pyogenes MGAS10394  
Streptococcus pyogenes MGAS315  
Streptococcus pyogenes MGAS5005  
Streptococcus pyogenes MGAS8232  
Streptococcus pyogenes SSI-1  
Streptococcus pyogenes MGAS10270  
Streptococcus pyogenes MGAS10750  
Streptococcus pyogenes MGAS2096  
Streptococcus pyogenes MGAS6180  
Streptococcus pyogenes MGAS9429

Streptococcus thermophilus LMG 18311  
Streptococcus thermophilus CNRZ1066

Synechococcus elongatus PCC 7942  
Synechococcus elongatus PCC 6301

Tropheryma whipplei Twist  
Tropheryma whipplei TW08 27

Vibrio vulnificus YJ016  
Vibrio vulnificus CMCP6

Xanthomonas campestris ATCC 33913  
Xanthomonas campestris 8004

Xanthomonas citri 306  
Xanthomonas campestris vesicatoria 85-10

Xylella fastidiosa Temecula1  
Xylella fastidiosa 9a5c

Yersinia pestis biovar Mediaevails  
Yersinia pestis CO92  
Yersinia pestis KIM  
Yersinia pseudotuberculosis IP32953
